# Supplementary material
Source: Springer Nature journal article supplement (https://www.springermedizin.de/resource/supplementary/12889_2010_2889_MOESM5_ESM.pdf/9487566)

# Exposure to Second Hand Smoke in Public Places

## Ability to Smoke at Work 2003–2005

LOCATION 2003 2005 Rate difference (95% CI)

### Full From No Ban

|        |      |      |                         |
|--------|------|------|-------------------------|
| Public | 27.7 | 10.4 | -17.30 [-22.79, -11.81] |
| Work   | 52.6 | 70.7 | -18.10 [-24.91, -11.29] |

### Par From No Ban

|        |      |      |                       |
|--------|------|------|-----------------------|
| Public | 20.7 | 11.5 | -9.20 [-13.01, -5.38] |
| Work   | 62.5 | 66.6 | -4.10 [-9.73, 1.53]   |

### Full From Par

|        |      |      |                       |
|--------|------|------|-----------------------|
| Public | 17.6 | 10.4 | -7.20 [-11.86, -2.54] |
| Work   | 65.6 | 67.7 | -2.10 [-9.49, 5.29]   |

### Strengthening Par

|        |      |      |                      |
|--------|------|------|----------------------|
| Public | 17.9 | 13.7 | -4.30 [-5.87, -2.63] |
| Work   | 69.3 | 69.4 | -0.01 [-2.48, 2.28]  |

### No Change Full

|        |      |      |                      |
|--------|------|------|----------------------|
| Public | 14.6 | 12.6 | -2.05 [-4.02, -0.08] |
| Work   | 66.1 | 68.9 | -2.80 [-5.65, 0.05]  |

### No Change Par

|        |      |      |                      |
|--------|------|------|----------------------|
| Public | 17.8 | 15.1 | -2.70 [-4.75, -0.65] |
| Work   | 59.4 | 62.5 | -3.10 [-6.15, -0.05] |

### Ontario

|        |      |      |                      |
|--------|------|------|----------------------|
| Public | 17.7 | 13.0 | -4.70 [-5.56, -3.84] |
| Work   | 65.2 | 67.5 | -2.30 [-3.50, -1.10] |

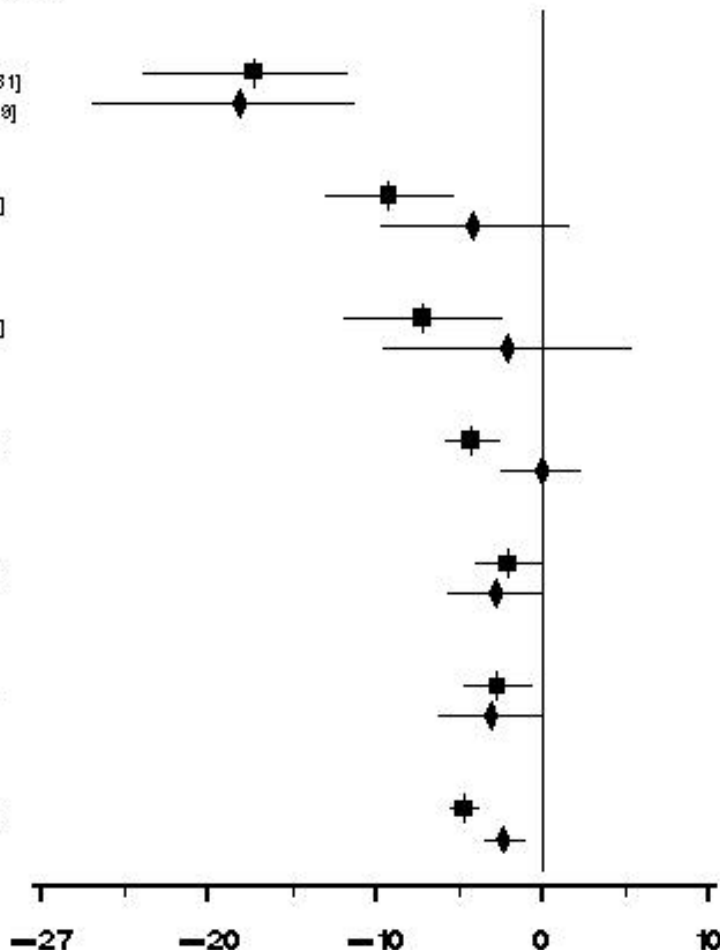

Supplement: MOESM5 [file 9487566]
